# Supplementary material for: G-Quadruplexes Involving Both Strands of Genomic DNA Are Highly Abundant and Colocalize with Functional Sites in the Human Genome
Source: PubMed Central journal article supplement (PMC4699641; doi:10.1371/journal.pone.0146174), 2016-01-04
Supplement: pone.0146174.s003.pdf [file pone.0146174.s003.pdf]

| Topology    | AAAA    |                   |        | AABB   |                   |        | ABAA    |                   |        | ABAB   |                   |        |
|-------------|---------|-------------------|--------|--------|-------------------|--------|---------|-------------------|--------|--------|-------------------|--------|
| Chromosome  | count   | fraction all      | %WG    | count  | fraction all      | %WG    | count   | fraction all      | %WG    | count  | fraction all      | %WG    |
| Genome wide | 374,834 | 0.2945 +/- 0.0005 | 100.0% | 69,198 | 0.0544 +/- 0.0002 | 100.0% | 142,890 | 0.1123 +/- 0.0003 | 100.0% | 55,735 | 0.0438 +/- 0.0002 | 100.0% |
| chr1        | 32,597  | 0.2890 +/- 0.0016 | 98.1%  | 6,225  | 0.0552 +/- 0.0007 | 101.5% | 12,311  | 0.1092 +/- 0.0010 | 97.2%  | 4,864  | 0.0431 +/- 0.0006 | 98.5%  |
| chr2        | 26,826  | 0.3039 +/- 0.0019 | 103.2% | 4,867  | 0.0551 +/- 0.0008 | 101.4% | 9,867   | 0.1118 +/- 0.0011 | 99.6%  | 3,814  | 0.0432 +/- 0.0007 | 98.7%  |
| chr3        | 18,839  | 0.3162 +/- 0.0023 | 107.4% | 3,389  | 0.0569 +/- 0.0010 | 104.6% | 6,685   | 0.1122 +/- 0.0014 | 99.9%  | 2,524  | 0.0424 +/- 0.0008 | 96.7%  |
| chr4        | 15,358  | 0.3179 +/- 0.0026 | 107.9% | 2,750  | 0.0569 +/- 0.0011 | 104.7% | 5,851   | 0.1211 +/- 0.0016 | 107.9% | 2,254  | 0.0467 +/- 0.0010 | 106.5% |
| chr5        | 17,587  | 0.3175 +/- 0.0024 | 107.8% | 3,131  | 0.0565 +/- 0.0010 | 104.0% | 6,414   | 0.1158 +/- 0.0014 | 103.1% | 2,448  | 0.0442 +/- 0.0009 | 100.9% |
| chr6        | 16,675  | 0.3226 +/- 0.0025 | 109.5% | 2,884  | 0.0558 +/- 0.0010 | 102.6% | 5,679   | 0.1099 +/- 0.0015 | 97.9%  | 2,258  | 0.0437 +/- 0.0009 | 99.8%  |
| chr7        | 19,372  | 0.2932 +/- 0.0021 | 99.5%  | 3,718  | 0.0563 +/- 0.0009 | 103.5% | 7,401   | 0.1120 +/- 0.0013 | 99.8%  | 2,839  | 0.0430 +/- 0.0008 | 98.1%  |
| chr8        | 15,750  | 0.3056 +/- 0.0024 | 103.8% | 2,743  | 0.0532 +/- 0.0010 | 97.9%  | 6,002   | 0.1165 +/- 0.0015 | 103.7% | 2,351  | 0.0456 +/- 0.0009 | 104.2% |
| chr9        | 17,522  | 0.2797 +/- 0.0021 | 95.0%  | 3,385  | 0.0540 +/- 0.0009 | 99.4%  | 7,133   | 0.1138 +/- 0.0013 | 101.4% | 2,754  | 0.0440 +/- 0.0008 | 100.4% |
| chr10       | 17,420  | 0.2899 +/- 0.0022 | 98.4%  | 3,139  | 0.0522 +/- 0.0009 | 96.1%  | 6,754   | 0.1124 +/- 0.0014 | 100.1% | 2,691  | 0.0448 +/- 0.0009 | 102.3% |
| chr11       | 19,984  | 0.2831 +/- 0.0020 | 96.1%  | 3,966  | 0.0562 +/- 0.0009 | 103.4% | 7,883   | 0.1117 +/- 0.0013 | 99.5%  | 3,111  | 0.0441 +/- 0.0008 | 100.7% |
| chr12       | 16,330  | 0.3030 +/- 0.0024 | 102.9% | 2,947  | 0.0547 +/- 0.0010 | 100.6% | 6,049   | 0.1122 +/- 0.0014 | 100.0% | 2,391  | 0.0444 +/- 0.0009 | 101.3% |
| chr13       | 7,802   | 0.3082 +/- 0.0035 | 104.6% | 1,406  | 0.0555 +/- 0.0015 | 102.1% | 2,962   | 0.1170 +/- 0.0021 | 104.2% | 1,174  | 0.0464 +/- 0.0014 | 105.9% |
| chr14       | 11,311  | 0.2886 +/- 0.0027 | 98.0%  | 2,090  | 0.0533 +/- 0.0012 | 98.1%  | 4,422   | 0.1128 +/- 0.0017 | 100.5% | 1,692  | 0.0432 +/- 0.0010 | 98.6%  |
| chr15       | 11,733  | 0.2919 +/- 0.0027 | 99.1%  | 2,145  | 0.0534 +/- 0.0012 | 98.2%  | 4,352   | 0.1083 +/- 0.0016 | 96.4%  | 1,734  | 0.0431 +/- 0.0010 | 98.5%  |
| chr16       | 16,495  | 0.2740 +/- 0.0021 | 93.0%  | 3,095  | 0.0514 +/- 0.0009 | 94.6%  | 6,683   | 0.1110 +/- 0.0014 | 98.9%  | 2,654  | 0.0441 +/- 0.0009 | 100.7% |
| chr17       | 18,897  | 0.2729 +/- 0.0020 | 92.7%  | 3,696  | 0.0534 +/- 0.0009 | 98.2%  | 7,253   | 0.1048 +/- 0.0012 | 93.3%  | 2,935  | 0.0424 +/- 0.0008 | 96.8%  |
| chr18       | 7,474   | 0.3150 +/- 0.0036 | 107.0% | 1,167  | 0.0492 +/- 0.0014 | 90.5%  | 2,735   | 0.1153 +/- 0.0022 | 102.7% | 1,012  | 0.0427 +/- 0.0013 | 97.4%  |
| chr19       | 20,794  | 0.2722 +/- 0.0019 | 92.4%  | 4,053  | 0.0531 +/- 0.0008 | 97.6%  | 8,279   | 0.1084 +/- 0.0012 | 96.5%  | 3,104  | 0.0406 +/- 0.0007 | 92.8%  |
| chr20       | 11,496  | 0.2770 +/- 0.0026 | 94.1%  | 2,234  | 0.0538 +/- 0.0011 | 99.0%  | 4,511   | 0.1087 +/- 0.0016 | 96.8%  | 1,814  | 0.0437 +/- 0.0010 | 99.8%  |
| chr21       | 4,848   | 0.2656 +/- 0.0038 | 90.2%  | 920    | 0.0504 +/- 0.0017 | 92.7%  | 2,077   | 0.1138 +/- 0.0025 | 101.3% | 870    | 0.0477 +/- 0.0016 | 108.8% |
| chr22       | 10,420  | 0.2452 +/- 0.0024 | 83.2%  | 2,204  | 0.0519 +/- 0.0011 | 95.4%  | 4,822   | 0.1134 +/- 0.0016 | 101.1% | 1,942  | 0.0457 +/- 0.0010 | 104.3% |
| chrX        | 16,468  | 0.3506 +/- 0.0027 | 119.1% | 2,654  | 0.0565 +/- 0.0011 | 103.9% | 5,715   | 0.1217 +/- 0.0016 | 108.4% | 2,081  | 0.0443 +/- 0.0010 | 101.2% |
| chrY        | 2,832   | 0.3373 +/- 0.0063 | 114.5% | 390    | 0.0464 +/- 0.0024 | 85.4%  | 1,048   | 0.1248 +/- 0.0039 | 111.2% | 424    | 0.0505 +/- 0.0025 | 115.3% |

| Topology    | ABBA   |                   |        | ABBB    |                   |        | BAAA    |                   |        |
|-------------|--------|-------------------|--------|---------|-------------------|--------|---------|-------------------|--------|
| Chromosome  | count  | fraction all      | %WG    | count   | fraction all      | %WG    | count   | fraction all      | %WG    |
| Genome wide | 96,163 | 0.0756 +/- 0.0002 | 100.0% | 152,329 | 0.1197 +/- 0.0003 | 100.0% | 150,294 | 0.1181 +/- 0.0003 | 100.0% |
| chr1        | 8,571  | 0.0760 +/- 0.0008 | 100.6% | 13,793  | 0.1223 +/- 0.0010 | 102.2% | 13,863  | 0.1229 +/- 0.0010 | 104.1% |
| chr2        | 6,477  | 0.0734 +/- 0.0009 | 97.1%  | 10,413  | 0.1180 +/- 0.0012 | 98.6%  | 10,357  | 0.1173 +/- 0.0012 | 99.4%  |
| chr3        | 4,345  | 0.0729 +/- 0.0011 | 96.5%  | 6,832   | 0.1147 +/- 0.0014 | 95.8%  | 6,798   | 0.1141 +/- 0.0014 | 96.6%  |
| chr4        | 3,457  | 0.0716 +/- 0.0012 | 94.7%  | 5,386   | 0.1115 +/- 0.0015 | 93.2%  | 5,081   | 0.1052 +/- 0.0015 | 89.1%  |
| chr5        | 3,889  | 0.0702 +/- 0.0011 | 92.9%  | 6,223   | 0.1123 +/- 0.0014 | 93.9%  | 6,306   | 0.1138 +/- 0.0014 | 96.4%  |
| chr6        | 3,545  | 0.0686 +/- 0.0012 | 90.8%  | 6,089   | 0.1178 +/- 0.0015 | 98.4%  | 5,820   | 0.1126 +/- 0.0015 | 95.3%  |
| chr7        | 5,131  | 0.0777 +/- 0.0011 | 102.8% | 7,964   | 0.1205 +/- 0.0014 | 100.7% | 7,644   | 0.1157 +/- 0.0013 | 98.0%  |
| chr8        | 3,695  | 0.0717 +/- 0.0012 | 94.9%  | 5,977   | 0.1160 +/- 0.0015 | 96.9%  | 5,818   | 0.1129 +/- 0.0015 | 95.6%  |
| chr9        | 4,876  | 0.0778 +/- 0.0011 | 103.0% | 7,624   | 0.1217 +/- 0.0014 | 101.7% | 7,554   | 0.1206 +/- 0.0014 | 102.1% |
| chr10       | 4,657  | 0.0775 +/- 0.0011 | 102.6% | 7,151   | 0.1190 +/- 0.0014 | 99.4%  | 7,051   | 0.1174 +/- 0.0014 | 99.4%  |
| chr11       | 5,428  | 0.0769 +/- 0.0010 | 101.8% | 8,564   | 0.1213 +/- 0.0013 | 101.4% | 8,543   | 0.1210 +/- 0.0013 | 102.5% |
| chr12       | 3,902  | 0.0724 +/- 0.0012 | 95.8%  | 6,441   | 0.1195 +/- 0.0015 | 99.8%  | 6,172   | 0.1145 +/- 0.0015 | 97.0%  |
| chr13       | 1,862  | 0.0735 +/- 0.0017 | 97.3%  | 2,744   | 0.1084 +/- 0.0021 | 90.6%  | 2,765   | 0.1092 +/- 0.0021 | 92.5%  |
| chr14       | 3,056  | 0.0780 +/- 0.0014 | 103.2% | 4,632   | 0.1182 +/- 0.0017 | 98.8%  | 4,747   | 0.1211 +/- 0.0018 | 102.6% |
| chr15       | 3,029  | 0.0754 +/- 0.0014 | 99.7%  | 4,916   | 0.1223 +/- 0.0017 | 102.2% | 4,903   | 0.1220 +/- 0.0017 | 103.3% |
| chr16       | 4,932  | 0.0819 +/- 0.0012 | 108.4% | 7,241   | 0.1203 +/- 0.0014 | 100.5% | 7,414   | 0.1231 +/- 0.0014 | 104.3% |
| chr17       | 5,450  | 0.0787 +/- 0.0011 | 104.2% | 9,016   | 0.1302 +/- 0.0014 | 108.8% | 8,714   | 0.1259 +/- 0.0013 | 106.6% |
| chr18       | 1,758  | 0.0741 +/- 0.0018 | 98.1%  | 2,662   | 0.1122 +/- 0.0022 | 93.8%  | 2,728   | 0.1150 +/- 0.0022 | 97.4%  |
| chr19       | 5,937  | 0.0777 +/- 0.0010 | 102.9% | 10,102  | 0.1322 +/- 0.0013 | 110.5% | 9,643   | 0.1262 +/- 0.0013 | 106.9% |
| chr20       | 3,286  | 0.0792 +/- 0.0014 | 104.8% | 5,227   | 0.1260 +/- 0.0017 | 105.2% | 5,052   | 0.1217 +/- 0.0017 | 103.1% |
| chr21       | 1,545  | 0.0846 +/- 0.0022 | 112.0% | 2,158   | 0.1182 +/- 0.0025 | 98.8%  | 2,123   | 0.1163 +/- 0.0025 | 98.5%  |
| chr22       | 3,699  | 0.0870 +/- 0.0014 | 115.2% | 5,508   | 0.1296 +/- 0.0017 | 108.3% | 5,286   | 0.1244 +/- 0.0017 | 105.3% |
| chrX        | 3,079  | 0.0656 +/- 0.0012 | 86.8%  | 4,864   | 0.1036 +/- 0.0015 | 86.5%  | 4,992   | 0.1063 +/- 0.0015 | 90.0%  |
| chrY        | 557    | 0.0663 +/- 0.0028 | 87.8%  | 801     | 0.0954 +/- 0.0034 | 79.7%  | 918     | 0.1093 +/- 0.0036 | 92.6%  |

| Topology    | BABA   |                   |        | BABB    |                   |        | BBAA   |                   |        |
|-------------|--------|-------------------|--------|---------|-------------------|--------|--------|-------------------|--------|
| Chromosome  | count  | fraction all      | %WG    | count   | fraction all      | %WG    | count  | fraction all      | %WG    |
| Genome wide | 49,558 | 0.0389 +/- 0.0002 | 100.0% | 128,404 | 0.1009 +/- 0.0003 | 100.0% | 53,364 | 0.0419 +/- 0.0002 | 100.0% |
| chr1        | 4,341  | 0.0385 +/- 0.0006 | 98.9%  | 11,371  | 0.1008 +/- 0.0009 | 99.9%  | 4,846  | 0.0430 +/- 0.0006 | 102.5% |
| chr2        | 3,418  | 0.0387 +/- 0.0007 | 99.4%  | 8,607   | 0.0975 +/- 0.0011 | 96.7%  | 3,625  | 0.0411 +/- 0.0007 | 97.9%  |
| chr3        | 2,148  | 0.0360 +/- 0.0008 | 92.6%  | 5,668   | 0.0951 +/- 0.0013 | 94.3%  | 2,360  | 0.0396 +/- 0.0008 | 94.5%  |
| chr4        | 1,715  | 0.0355 +/- 0.0009 | 91.2%  | 4,647   | 0.0962 +/- 0.0014 | 95.3%  | 1,811  | 0.0375 +/- 0.0009 | 89.4%  |
| chr5        | 2,032  | 0.0367 +/- 0.0008 | 94.2%  | 5,210   | 0.0940 +/- 0.0013 | 93.2%  | 2,157  | 0.0389 +/- 0.0008 | 92.9%  |
| chr6        | 1,902  | 0.0368 +/- 0.0008 | 94.5%  | 4,760   | 0.0921 +/- 0.0013 | 91.3%  | 2,079  | 0.0402 +/- 0.0009 | 95.9%  |
| chr7        | 2,617  | 0.0396 +/- 0.0008 | 101.7% | 6,684   | 0.1012 +/- 0.0012 | 100.3% | 2,708  | 0.0410 +/- 0.0008 | 97.7%  |
| chr8        | 2,071  | 0.0402 +/- 0.0009 | 103.2% | 5,067   | 0.0983 +/- 0.0014 | 97.4%  | 2,067  | 0.0401 +/- 0.0009 | 95.7%  |
| chr9        | 2,590  | 0.0413 +/- 0.0008 | 106.2% | 6,438   | 0.1028 +/- 0.0013 | 101.9% | 2,777  | 0.0443 +/- 0.0008 | 105.7% |
| chr10       | 2,442  | 0.0406 +/- 0.0008 | 104.4% | 6,249   | 0.1040 +/- 0.0013 | 103.1% | 2,531  | 0.0421 +/- 0.0008 | 100.5% |
| chr11       | 2,710  | 0.0384 +/- 0.0007 | 98.6%  | 7,359   | 0.1043 +/- 0.0012 | 103.3% | 3,034  | 0.0430 +/- 0.0008 | 102.5% |
| chr12       | 2,032  | 0.0377 +/- 0.0008 | 96.8%  | 5,381   | 0.0998 +/- 0.0014 | 99.0%  | 2,254  | 0.0418 +/- 0.0009 | 99.7%  |
| chr13       | 944    | 0.0373 +/- 0.0012 | 95.8%  | 2,576   | 0.1017 +/- 0.0020 | 100.9% | 1,082  | 0.0427 +/- 0.0013 | 101.9% |
| chr14       | 1,574  | 0.0402 +/- 0.0010 | 103.1% | 3,943   | 0.1006 +/- 0.0016 | 99.7%  | 1,725  | 0.0440 +/- 0.0011 | 105.0% |
| chr15       | 1,546  | 0.0385 +/- 0.0010 | 98.8%  | 4,177   | 0.1039 +/- 0.0016 | 103.0% | 1,657  | 0.0412 +/- 0.0010 | 98.3%  |
| chr16       | 2,504  | 0.0416 +/- 0.0008 | 106.8% | 6,466   | 0.1074 +/- 0.0013 | 106.5% | 2,721  | 0.0452 +/- 0.0009 | 107.8% |
| chr17       | 2,770  | 0.0400 +/- 0.0008 | 102.8% | 7,410   | 0.1070 +/- 0.0012 | 106.1% | 3,093  | 0.0447 +/- 0.0008 | 106.6% |
| chr18       | 909    | 0.0383 +/- 0.0013 | 98.4%  | 2,326   | 0.0980 +/- 0.0020 | 97.2%  | 953    | 0.0402 +/- 0.0013 | 95.8%  |
| chr19       | 2,996  | 0.0392 +/- 0.0007 | 100.7% | 8,184   | 0.1071 +/- 0.0012 | 106.2% | 3,299  | 0.0432 +/- 0.0008 | 103.0% |
| chr20       | 1,774  | 0.0427 +/- 0.0010 | 109.8% | 4,405   | 0.1061 +/- 0.0016 | 105.2% | 1,701  | 0.0410 +/- 0.0010 | 97.8%  |
| chr21       | 831    | 0.0455 +/- 0.0016 | 116.9% | 2,047   | 0.1121 +/- 0.0025 | 111.1% | 837    | 0.0458 +/- 0.0016 | 109.4% |
| chr22       | 1,874  | 0.0441 +/- 0.0010 | 113.2% | 4,751   | 0.1118 +/- 0.0016 | 110.8% | 1,998  | 0.0470 +/- 0.0011 | 112.1% |
| chrX        | 1,498  | 0.0319 +/- 0.0008 | 81.9%  | 3,883   | 0.0827 +/- 0.0013 | 81.9%  | 1,735  | 0.0369 +/- 0.0009 | 88.1%  |
| chrY        | 320    | 0.0381 +/- 0.0021 | 97.9%  | 793     | 0.0944 +/- 0.0034 | 93.6%  | 314    | 0.0374 +/- 0.0021 | 89.2%  |
