# Supplementary material for: G-Quadruplexes Involving Both Strands of Genomic DNA Are Highly Abundant and Colocalize with Functional Sites in the Human Genome
Source: PubMed Central journal article supplement (PMC4699641; doi:10.1371/journal.pone.0146174), 2016-01-04
Supplement: pone.0146174.s004.pdf [file pone.0146174.s004.pdf]

| Site         |               | tot. length % genome # total |        |        | Intrastrand PQS |        |       |         | DS-PQS  |        |       |         | Any PQS |        |       |         | SS PQS only |       |       | DS PQS only |       |      | DS/SS ratio |
|--------------|---------------|------------------------------|--------|--------|-----------------|--------|-------|---------|---------|--------|-------|---------|---------|--------|-------|---------|-------------|-------|-------|-------------|-------|------|-------------|
|              |               |                              |        |        | # sites         | %G4's  | enr.  | % sites | # sites | %G4's  | enr.  | % sites | #sites  | %G4's  | enr.  | % sites | #sites      | %G4's | enr.  | #sites      | %G4's | enr. |             |
| 1 kb up      | 1kb upstr     | 39927000                     | 1.21%  | 39927  | 17975           | 4.80%  | 3.96  | 45.0%   | 20976   | 3.81%  | 3.15  | 52.5%   | 25199   | 3.03%  | 2.50  | 63.1%   | 4223        | 1.50% | 1.24  | 7224        | 1.58% | 1.30 | 1.17        |
| Hf2 antibody | 1+ libraries  | 7177070                      | 0.22%  | 9149   | 1095            | 0.29%  | 1.34  | 12.0%   | 754     | 0.14%  | 0.63  | 8.2%    | 1582    | 0.19%  | 0.87  | 17.3%   | 828         | 0.29% | 1.35  | 487         | 0.11% | 0.49 | 0.69        |
|              | 2+ libraries  | 1088783                      | 0.033% | 771    | 177             | 0.05%  | 1.43  | 23.0%   | 128     | 0.02%  | 0.70  | 16.6%   | 256     | 0.031% | 0.93  | 33.2%   | 128         | 0.05% | 1.38  | 79          | 0.02% | 0.52 | 0.72        |
| G4-seq       | PDS & K+      | 39141070                     | 1.19%  | 490269 | 177119          | 47.25% | 39.84 | 36.1%   | 108229  | 19.64% | 16.56 | 22.1%   | 226496  | 27.2%  | 22.94 | 46.2%   | 118267      | 42.0% | 35.41 | 49377       | 10.8% | 9.10 | 0.61        |
| XPD peaks    | Ont-7nt loop  | 14539969                     | 0.44%  | 14570  | 3288            | 0.88%  | 1.99  | 22.6%   | 6052    | 1.10%  | 2.49  | 41.5%   | 6995    | 0.84%  | 1.91  | 48.0%   | 943         | 0.33% | 0.76  | 3707        | 0.81% | 1.84 | 1.84        |
|              | Ont-12nt loop | 14539969                     | 0.44%  | 14570  | 5852            | 1.56%  | 3.54  | 40.2%   | 9984    | 1.81%  | 4.11  | 68.5%   | 10665   | 1.28%  | 2.91  | 73.2%   | 681         | 0.24% | 0.55  | 4813        | 1.05% | 2.39 | 1.71        |
| XPB peaks    | Ont-7nt loop  | 19179584                     | 0.58%  | 21555  | 4466            | 1.19%  | 2.05  | 20.7%   | 8363    | 1.52%  | 2.61  | 38.8%   | 9769    | 1.17%  | 2.02  | 45.3%   | 1406        | 0.50% | 0.86  | 5303        | 1.16% | 1.99 | 1.87        |
|              | Ont-12nt loop | 19179584                     | 0.58%  | 21555  | 8146            | 2.17%  | 3.74  | 37.8%   | 14100   | 2.56%  | 4.40  | 65.4%   | 15154   | 1.82%  | 3.13  | 70.3%   | 1054        | 0.37% | 0.64  | 7008        | 1.53% | 2.63 | 1.73        |
| ORI MCF7     | Ont-7nt loop  | 42049150                     | 1.27%  | 94195  | 24117           | 6.43%  | 5.05  | 25.6%   | 34425   | 6.25%  | 4.90  | 36.5%   | 42108   | 5.06%  | 3.97  | 44.7%   | 7683        | 2.73% | 2.14  | 17991       | 3.93% | 3.08 | 1.43        |
|              | Ont-12nt loop | 42049150                     | 1.27%  | 94195  | 39781           | 10.61% | 8.33  | 42.2%   | 55157   | 10.01% | 7.86  | 58.6%   | 62288   | 7.48%  | 5.87  | 66.1%   | 7131        | 2.53% | 1.99  | 22507       | 4.92% | 3.86 | 1.39        |
| ORI K562     | Ont-7nt loop  | 21824174                     | 0.66%  | 62971  | 12583           | 3.36%  | 5.08  | 20.0%   | 16724   | 3.04%  | 4.59  | 26.6%   | 22331   | 2.68%  | 4.06  | 35.5%   | 5607        | 1.99% | 3.01  | 9748        | 2.13% | 3.22 | 1.33        |
|              | Ont-12nt loop | 21824174                     | 0.66%  | 62971  | 23208           | 6.19%  | 9.36  | 36.9%   | 30140   | 5.47%  | 8.27  | 47.9%   | 36467   | 4.38%  | 6.62  | 57.9%   | 6327        | 2.25% | 3.40  | 13259       | 2.90% | 4.38 | 1.30        |
| WG unique    |               |                              |        |        | 374834          |        |       |         | 550977  |        |       |         | 832540  |        |       |         | 281563      |       |       | 457706      |       |      | 1.47        |

**Table S2. Detailed functional analysis of intrastrand and interstrand G-quadruplex sequences in human genome.**

Site: type of functional site (transcriptional helicase binding, origin of replication, promoter, hf2 antibody binding)

For helicase peaks and origins of replication, G4 PQS's allowing loops up to 12nt are also shown.

Total length, % genome, # total – number of sites and fraction of genome, regardless of PQS presence

Intrastrand PQS – sites overlapping with a single-strand G4 sequence

DS-PQS – sites overlapping with an interstrand G4

Any PQS – sites overlapping with at least one G4 of any type

SS PQS only – sites overlapping with an intrastrand PQS but not with a DS-PQS

DS PQS only – sites overlapping with an interstrand PQS but not with an intrastand G4

DS/SS – ratio of sites of the given type with at least one interstrand G4 to sites with at least one intrastrand G4

In each category: the number (#sites) and percentage (%sites) of sites with a G4 motif, and enrichment ratio (wrt whole-genome) of G4's within in the sites are listed.

%G4s – fraction of all G4s of this class that are in this type of site.
