# Supplementary material for: G-Quadruplexes Involving Both Strands of Genomic DNA Are Highly Abundant and Colocalize with Functional Sites in the Human Genome
Source: PubMed Central journal article supplement (PMC4699641; doi:10.1371/journal.pone.0146174), 2016-01-04
Supplement: pone.0146174.s005.pdf [file pone.0146174.s005.pdf]

PQS sequences of different topologies associated with functional sites

| Topology                     | Genome  | XPD   | XPB   | MCF7_ORI | K562_ORI | hf2  | upstream1000 |
|------------------------------|---------|-------|-------|----------|----------|------|--------------|
| PQS by topology and function |         |       |       |          |          |      |              |
| AAAA                         | 374834  | 4338  | 5809  | 36594    | 17533    | 2174 | 34903        |
| AABB                         | 69198   | 1058  | 1417  | 6892     | 2167     | 102  | 5468         |
| ABAA                         | 142890  | 2385  | 3179  | 16937    | 6303     | 246  | 13149        |
| ABAB                         | 55735   | 881   | 1227  | 6008     | 1978     | 65   | 4708         |
| ABBA                         | 96163   | 1838  | 2445  | 10938    | 3518     | 165  | 8914         |
| ABBB                         | 152329  | 2768  | 3679  | 20139    | 7340     | 289  | 15371        |
| BAAA                         | 150294  | 2806  | 3684  | 19049    | 6994     | 256  | 16388        |
| BABA                         | 49558   | 913   | 1263  | 5781     | 1802     | 89   | 4944         |
| BABB                         | 128404  | 2417  | 3268  | 17316    | 6491     | 267  | 13494        |
| BBAA                         | 53364   | 1045  | 1397  | 5875     | 1820     | 91   | 5697         |
| ALL                          | 1272769 | 20449 | 27368 | 145529   | 55946    | 3744 | 123036       |
| interstrand                  | 897935  | 16111 | 21559 | 108935   | 38413    | 1570 | 88133        |

Fraction of all quadruplexes [%]

|      |        |        |        |        |        |        |        |
|------|--------|--------|--------|--------|--------|--------|--------|
| AAAA | 29.45% | 21.21% | 21.23% | 25.15% | 31.34% | 58.07% | 28.37% |
| AABB | 5.44%  | 5.17%  | 5.18%  | 4.74%  | 3.87%  | 2.72%  | 4.44%  |
| ABAA | 11.23% | 11.66% | 11.62% | 11.64% | 11.27% | 6.57%  | 10.69% |
| ABAB | 4.38%  | 4.31%  | 4.48%  | 4.13%  | 3.54%  | 1.74%  | 3.83%  |
| ABBA | 7.56%  | 8.99%  | 8.93%  | 7.52%  | 6.29%  | 4.41%  | 7.25%  |
| ABBB | 11.97% | 13.54% | 13.44% | 13.84% | 13.12% | 7.72%  | 12.49% |
| BAAA | 11.81% | 13.72% | 13.46% | 13.09% | 12.50% | 6.84%  | 13.32% |
| BABA | 3.89%  | 4.46%  | 4.61%  | 3.97%  | 3.22%  | 2.38%  | 4.02%  |
| BABB | 10.09% | 11.82% | 11.94% | 11.90% | 11.60% | 7.13%  | 10.97% |
| BBAA | 4.19%  | 5.11%  | 5.10%  | 4.04%  | 3.25%  | 2.43%  | 4.63%  |

Fraction of all PQS in functional categories, compared to genome-wide fractions

|      |         |         |         |         |         |         |         |
|------|---------|---------|---------|---------|---------|---------|---------|
| AAAA | 100.00% | 72.03%  | 72.07%  | 85.38%  | 106.41% | 197.17% | 96.33%  |
| AABB | 100.00% | 95.16%  | 95.23%  | 87.11%  | 71.24%  | 50.11%  | 81.74%  |
| ABAA | 100.00% | 103.89% | 103.47% | 103.67% | 100.35% | 58.53%  | 95.19%  |
| ABAB | 100.00% | 98.38%  | 102.38% | 94.28%  | 80.74%  | 39.65%  | 87.38%  |
| ABBA | 100.00% | 118.96% | 118.24% | 99.48%  | 83.23%  | 58.33%  | 95.89%  |
| ABBB | 100.00% | 113.10% | 112.32% | 115.63% | 109.62% | 64.50%  | 104.38% |
| BAAA | 100.00% | 116.20% | 113.99% | 110.85% | 105.87% | 57.90%  | 112.80% |
| BABA | 100.00% | 114.67% | 118.52% | 102.02% | 82.72%  | 61.05%  | 103.20% |
| BABB | 100.00% | 117.16% | 118.36% | 117.94% | 115.00% | 70.69%  | 108.71% |
| BBAA | 100.00% | 121.88% | 121.75% | 96.29%  | 77.59%  | 57.97%  | 110.44% |

Fraction of Interstrand [%]

|      |        |        |        |        |        |        |        |
|------|--------|--------|--------|--------|--------|--------|--------|
| AABB | 7.71%  | 6.57%  | 6.57%  | 6.33%  | 5.64%  | 6.50%  | 6.20%  |
| ABAA | 15.91% | 14.80% | 14.75% | 15.55% | 16.41% | 15.67% | 14.92% |
| ABAB | 6.21%  | 5.47%  | 5.69%  | 5.52%  | 5.15%  | 4.14%  | 5.34%  |
| ABBA | 10.71% | 11.41% | 11.34% | 10.04% | 9.16%  | 10.51% | 10.11% |
| ABBB | 16.96% | 17.18% | 17.06% | 18.49% | 19.11% | 18.41% | 17.44% |
| BAAA | 16.74% | 17.42% | 17.09% | 17.49% | 18.21% | 16.31% | 18.59% |
| BABA | 5.52%  | 5.67%  | 5.86%  | 5.31%  | 4.69%  | 5.67%  | 5.61%  |
| BABB | 14.30% | 15.00% | 15.16% | 15.90% | 16.90% | 17.01% | 15.31% |
| BBAA | 5.94%  | 6.49%  | 6.48%  | 5.39%  | 4.74%  | 5.80%  | 6.46%  |

Fraction of interstrand G4s in functional categories, compared to genome-wide fractions

|      |         |         |         |         |         |         |         |
|------|---------|---------|---------|---------|---------|---------|---------|
| AABB | 100.00% | 85.21%  | 85.29%  | 82.10%  | 73.20%  | 84.30%  | 80.51%  |
| ABAA | 100.00% | 93.03%  | 92.66%  | 97.70%  | 103.11% | 98.46%  | 93.76%  |
| ABAB | 100.00% | 88.10%  | 91.69%  | 88.85%  | 82.96%  | 66.70%  | 86.06%  |
| ABBA | 100.00% | 106.53% | 105.90% | 93.76%  | 85.52%  | 98.13%  | 94.44%  |
| ABBB | 100.00% | 101.28% | 100.59% | 108.98% | 112.64% | 108.51% | 102.81% |
| BAAA | 100.00% | 104.06% | 102.09% | 104.47% | 108.78% | 97.42%  | 111.09% |
| BABA | 100.00% | 102.68% | 106.15% | 96.15%  | 85.00%  | 102.71% | 101.64% |
| BABB | 100.00% | 104.91% | 106.00% | 111.16% | 118.17% | 118.93% | 107.07% |
| BBAA | 100.00% | 109.14% | 109.03% | 90.75%  | 79.72%  | 97.53%  | 108.77% |

Estimated significance of enrichment wrt genome-wide ratios (expressed in standard deviations) – all PQS

|      |       |       |       |       |      |       |
|------|-------|-------|-------|-------|------|-------|
| AAAA | -18.4 | -21.3 | -28.0 | 8.5   | 45.3 | -6.9  |
| AABB | -1.6  | -1.8  | -10.7 | -13.4 | -5.0 | -13.5 |
| ABAA | 1.9   | 2.0   | 4.8   | 0.3   | -6.5 | -5.5  |
| ABAB | -0.5  | 0.8   | -4.4  | -8.6  | -4.9 | -8.7  |
| ABBA | 8.1   | 9.0   | -0.5  | -9.9  | -5.4 | -3.9  |
| ABBB | 6.9   | 7.5   | 22.2  | 8.2   | -6.0 | 5.4   |
| BAAA | 8.6   | 8.5   | 15.0  | 4.9   | -6.7 | 16.4  |
| BABA | 4.4   | 6.6   | 1.5   | -7.3  | -3.7 | 2.3   |
| BABB | 8.4   | 10.5  | 23.6  | 12.1  | -4.8 | 10.1  |
| BBAA | 7.1   | 8.1   | -2.8  | -9.6  | -4.0 | 7.9   |

Estimated significance of enrichment wrt genome-wide ratios (expressed in standard deviations) – DS-PQS only

|      |      |      |       |       |      |       |
|------|------|------|-------|-------|------|-------|
| AABB | -4.8 | -5.5 | -14.9 | -12.5 | -1.6 | -14.4 |
| ABAA | -3.4 | -4.1 | -3.0  | 2.5   | -0.2 | -7.2  |
| ABAB | -3.5 | -2.9 | -8.6  | -7.6  | -2.7 | -9.6  |
| ABBA | 2.8  | 2.9  | -6.5  | -8.6  | -0.2 | -5.2  |
| ABBB | 0.7  | 0.4  | 12.7  | 10.8  | 1.4  | 3.5   |
| BAAA | 2.1  | 1.3  | 6.2   | 7.3   | -0.4 | 14.2  |
| BABA | 0.8  | 2.2  | -2.9  | -6.4  | 0.3  | 1.2   |
| BABB | 2.4  | 3.4  | 14.7  | 14.6  | 3.1  | 8.2   |
| BBAA | 3.0  | 3.4  | -7.1  | -8.6  | -0.2 | 6.6   |
